# Supplementary material for: Phytosphingosine exhibits an anti-epithelial–mesenchymal transition function by the inhibition of EGFR signaling in human breast cancer cells
Source: PubMed Central journal article supplement (PMC5649924; doi:10.18632/oncotarget.20783), 2017-09-08
Supplement: oncotarget-08-77794-s001.pdf [file oncotarget-08-77794-s001.pdf]

# Phytosphingosine exhibits an anti-epithelial-mesenchymal transition function by the inhibition of EGFR signaling in human breast cancer cells

## SUPPLEMENTARY MATERIALS

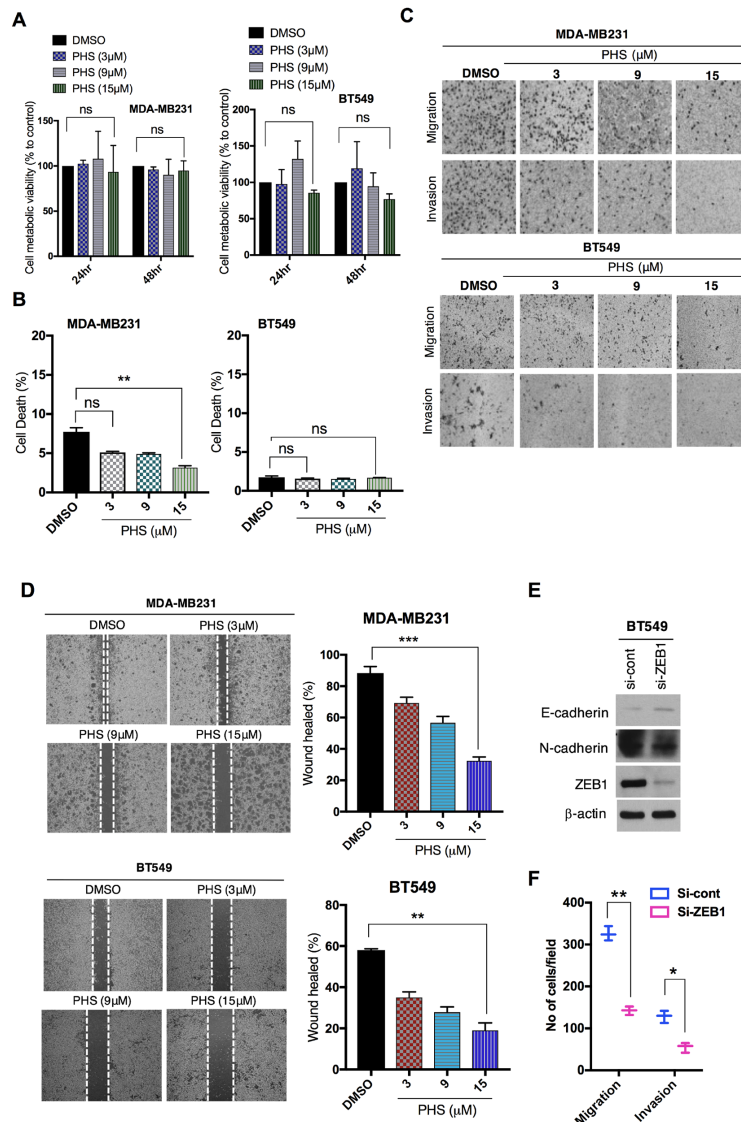

**Supplementary Figure 1: PHS critically downregulates EMT of basal type breast cancer cells through ZEB1.** (A) MTT assays in MDA-MB231 and BT549 cells with increasing concentrations of PHS with incubation time-dependent manner. (B) Cell death PI (propidium iodide) analysis in MDA-MB231 and BT549 cells with increasing concentrations of PHS at 48 hr. (C) Migration and invasion assays in transwells after DMSO or PHS treatment in MDA-MB231 and BT549 cells at various concentrations. (D) Representative images and graphical presentation of wound healing assays in PHS-treated MDA-MB231 (Upper panel) and BT549 cells (Lower panel). (E) Western blot for EMT markers such as E-cadherin, N-cadherin in PHS-treated BT549 breast cancer cells that are transfected with siRNA targeting ZEB1. (F) Migration and invasion assay in BT549 cells that are transfected with siRNA targeting ZEB1.  $\beta$ -actin was used as a loading control. Error bars represent mean  $\pm$  S.D. of triplicate samples. \* $p < 0.05$ , \*\* $p < 0.01$ , and \*\*\* $p < 0.001$ .

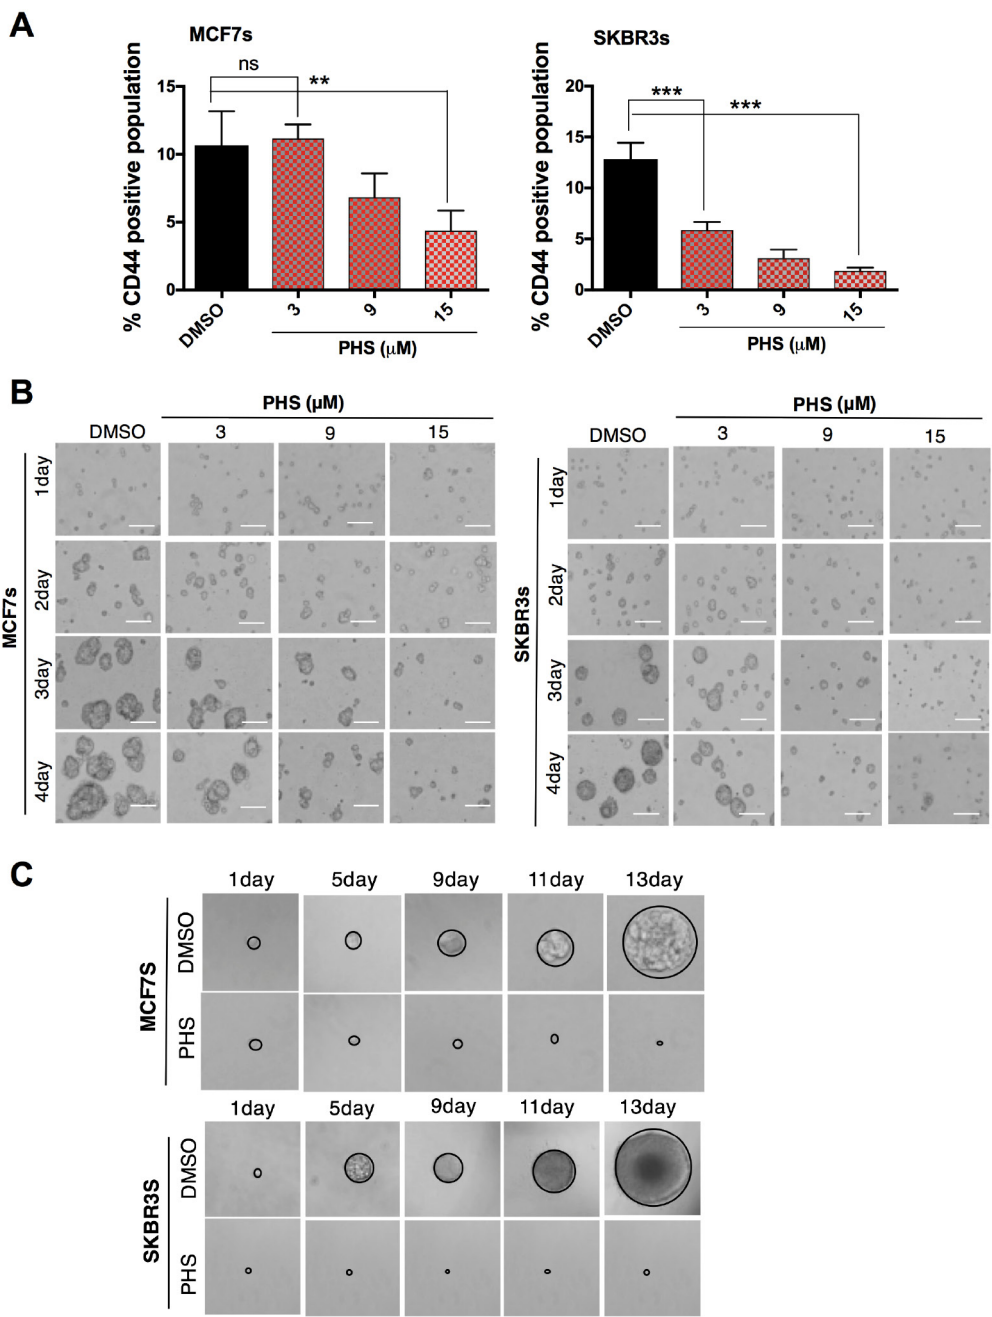

**Supplementary Figure 2: PHS decreases CD44 expression and self-renewal capacity of breast cancer cells through targeting OCT4. (A)** FACS analysis of CD44-PE expression in MCF7 and SKBR3 mammospheres treated with increasing concentrations of PHS. **(B)** Sphere forming assay of MCF7 (Left panel) and SKBR3 (Right panel) sphere cells at 1-4 day cultured with or without PHS (10μM). Scale bar represents 50μm. **(C)** Clonal assays of MCF7 and SKBR3 sphere cells at 1-13 day cultured with or without PHS (10μM). *(continued)*

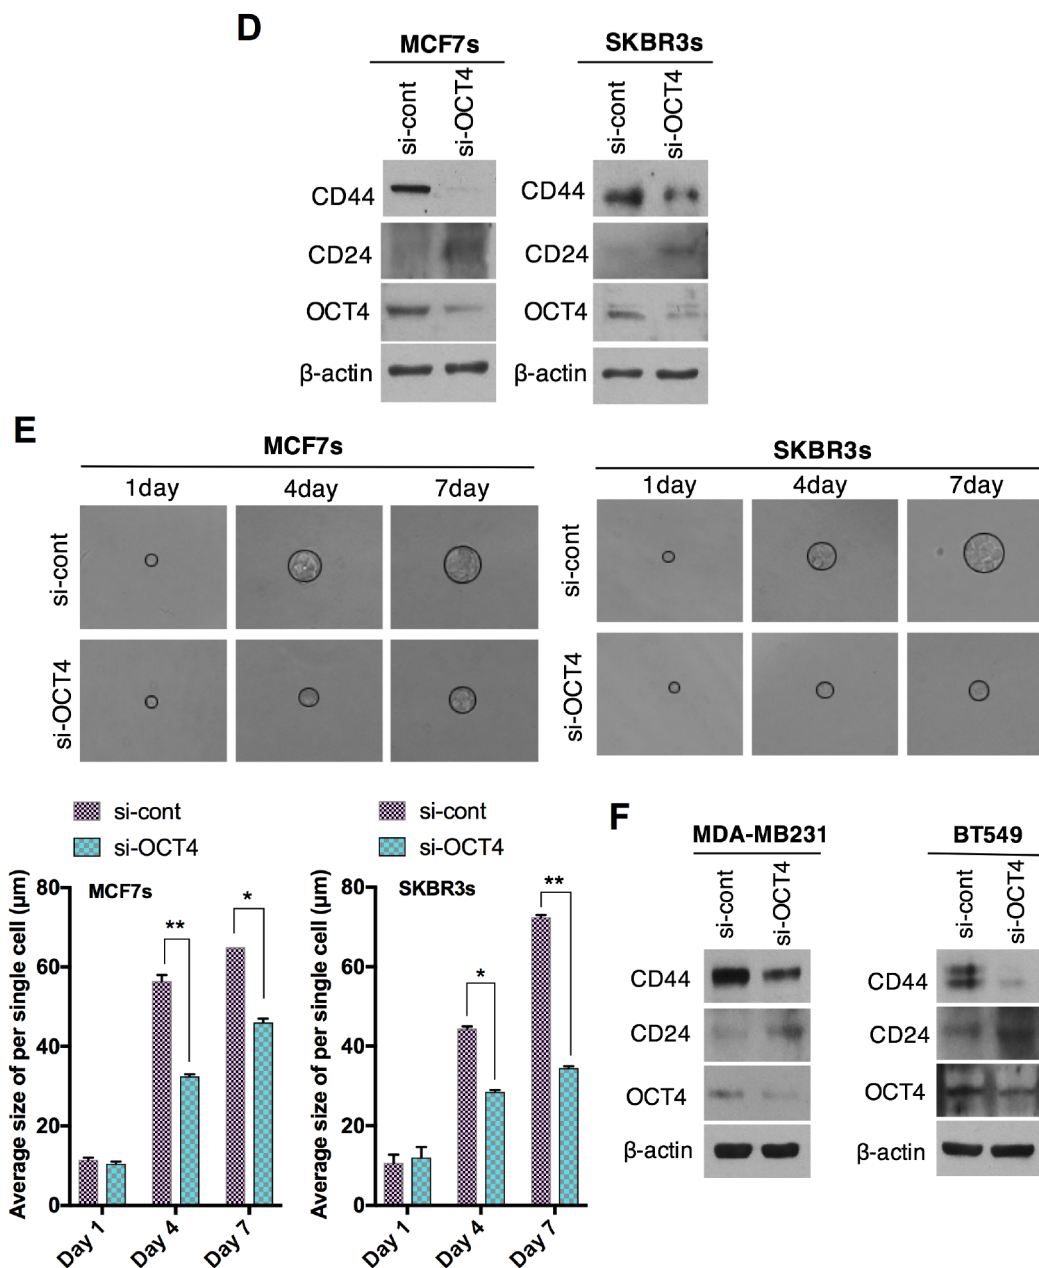

**Supplementary Figure 2: PHS decreases CD44 expression and self-renewal capacity of breast cancer cells through targeting OCT4.** (D) Western blot analysis of CD44 and CD24 protein levels in MCF7 and SKBR3 sphere cultured cell lines after OCT4 silencing. (E) Clonal assays of MCF7 and SKBR3 sphere cells at different time points cultured after targeting with si-OCT4. (F) Western blot analysis of CD44 and CD24 protein levels in MDA-MB231 and BT549 cell lines after OCT4 silencing. Error bars represent mean ± S.D. of triplicate samples. \*  $p < 0.05$ , \*\*  $p < 0.01$  and \*\*\*  $p < 0.001$ .

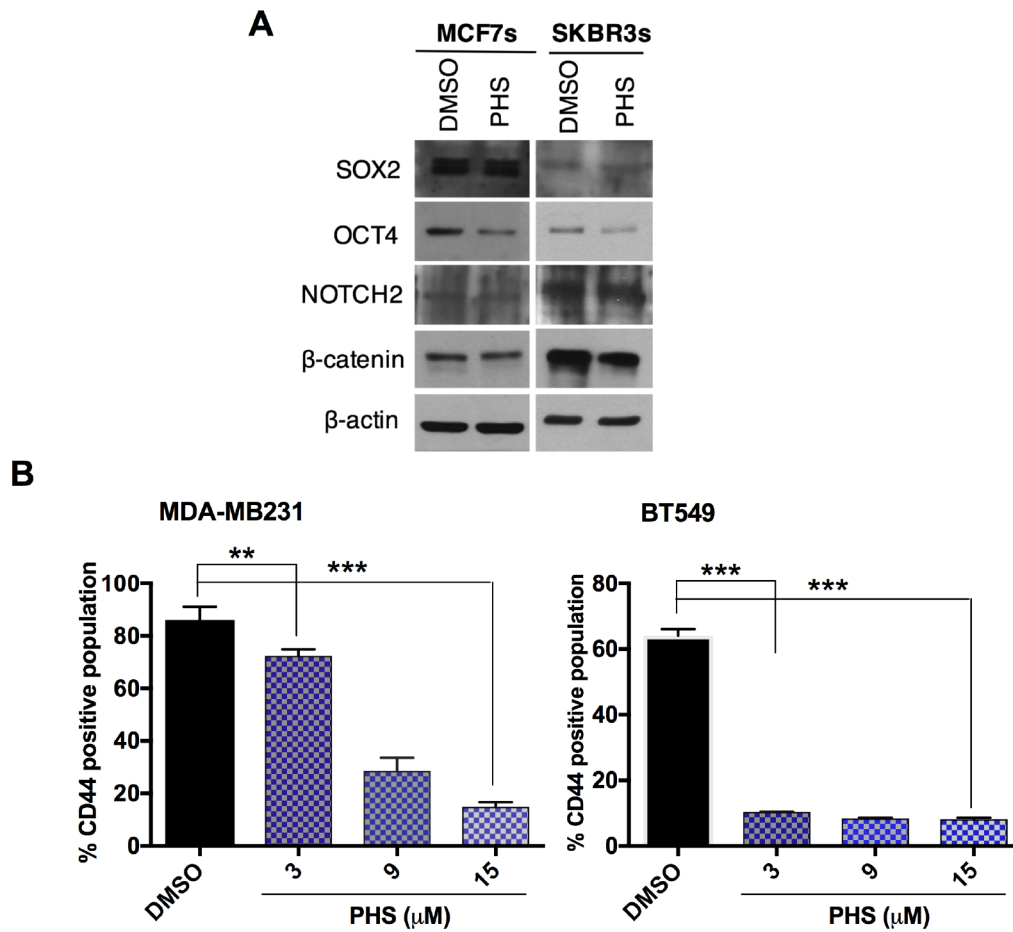

**Supplementary Figure 3: PHS reduces the CD44 population in concentration-dependent manner.** (A) Western blot analysis results for SOX2, OCT4, NOTCH2 and  $\beta$ -catenin in MCF7 and SKBR3 spheres cultured with or without PHS (10 $\mu$ M). (B) PHS attenuated the CD44 positive population in basal type breast cancer cells. Error bars represent mean  $\pm$  S.D. of triplicate samples. \*\*  $p < 0.01$  and \*\*\*  $p < 0.001$ .

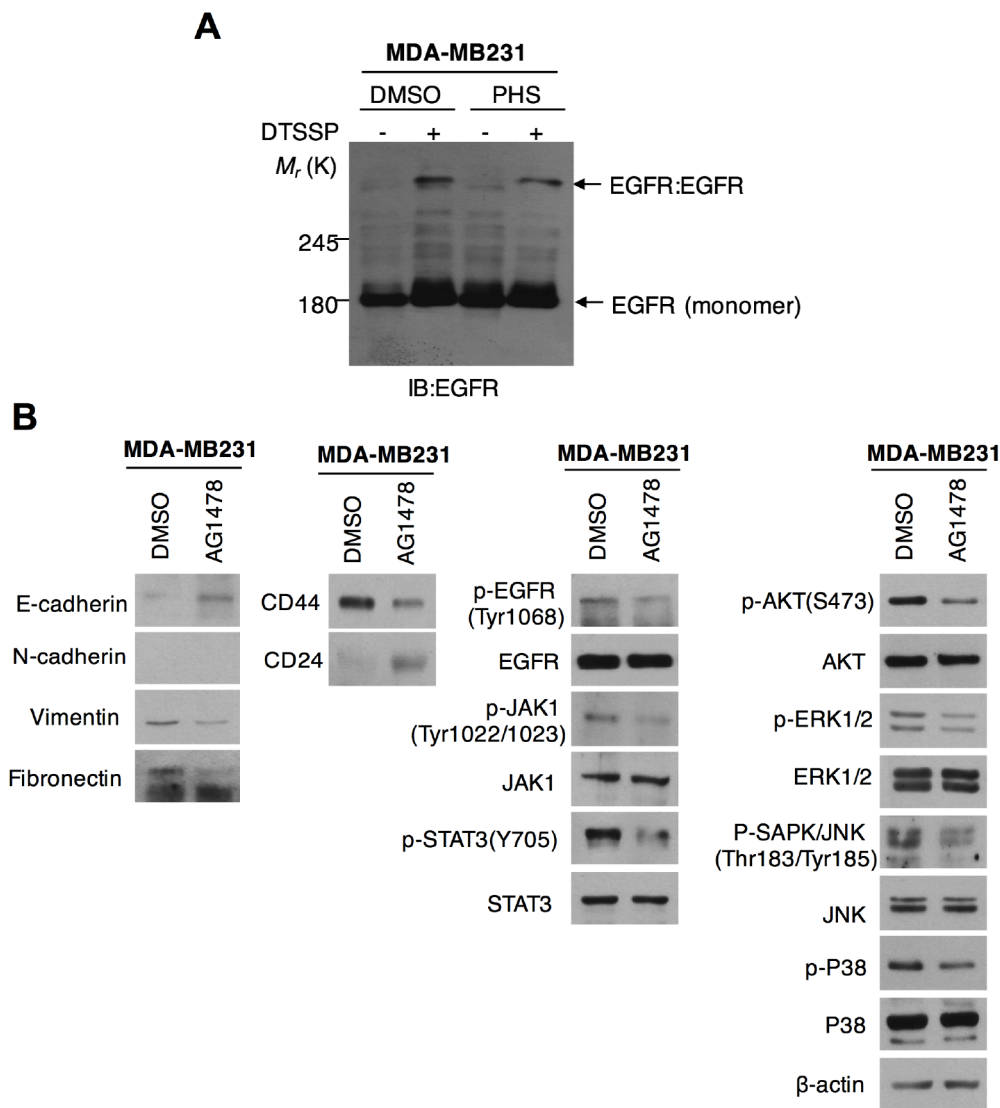

**Supplementary Figure 4: PHS does not affect EGFR homodimerization to block EGFR downstream pathway.** (A) Immunoblot detection using the EGFR antibodies in MDA-MB231 cells treated with PHS followed by DTSSP chemical crosslinking (1mM) for 30 min. (B) Western blot analysis in MDAMB-231 for EMT, CSC markers and EGFR downstream signaling axis after EGFR inhibitor (AG1478,10 $\mu$ M) treatment.

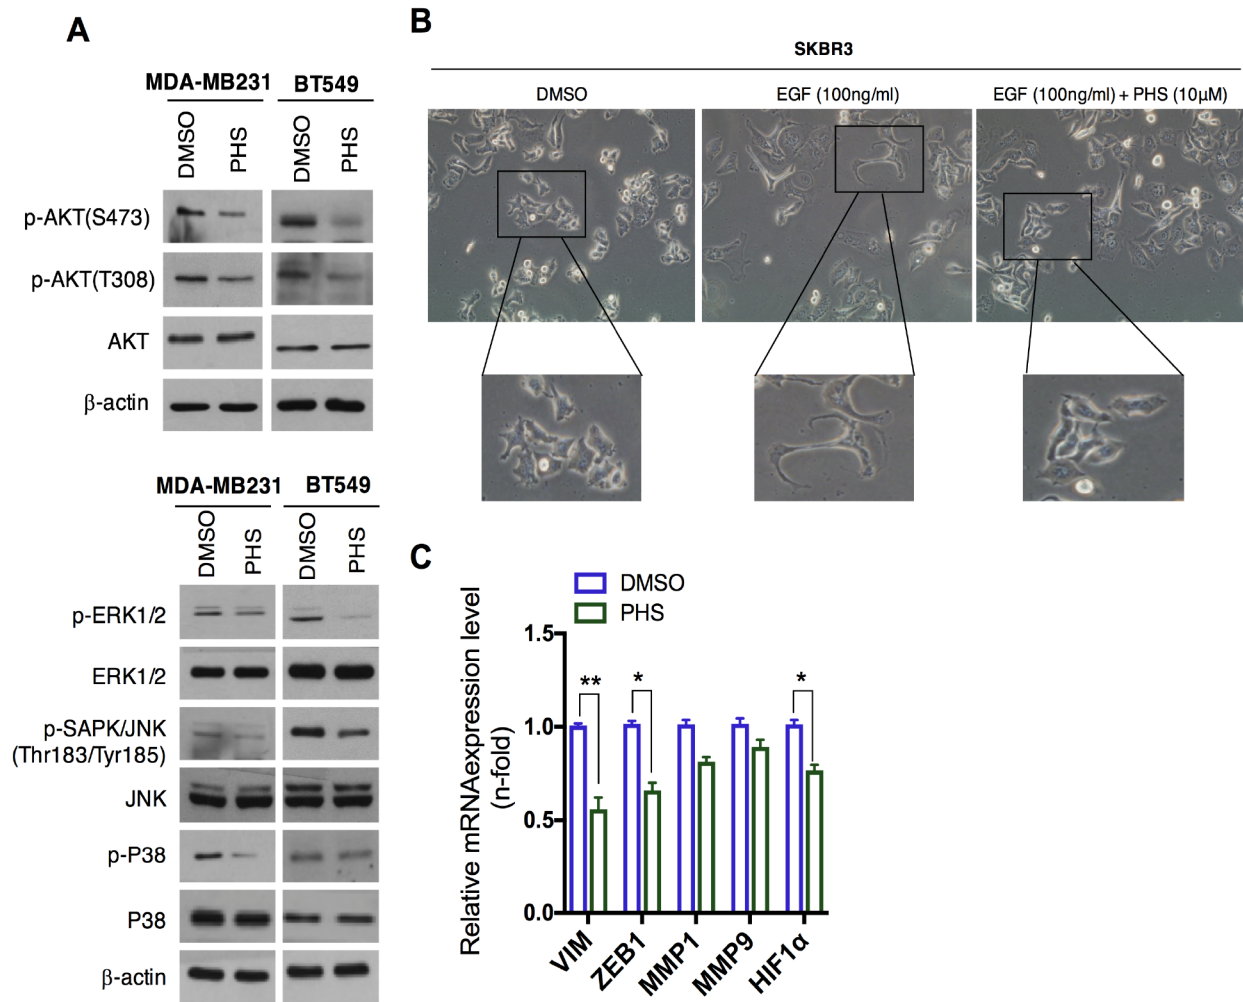

**Supplementary Figure 5: PHS decreases MAPK and AKT pathways involved in EMT and decreased invasiveness in breast cancer cells.** (A) Western blot for MAPK and AKT phosphorylation in MDA-MB231 and BT549 cells after DMSO and PHS treatment (10μM). (B) Representative images of EGF and PHS treated SKBR3 cells observed at 20X magnification. Depiction graph is shown to represent the extent of migrated or invaded cells/field. (C) qPCR analysis of STAT3 directly targeted genes in DMSO and PHS treated MDA-MB231 cells. Error bars represent mean ± S.D. of triplicate samples, \*  $p < 0.05$ , \*\*  $p < 0.01$ , and \*\*\*  $p < 0.001$ .
